# Supplementary material for: Microwave-assisted synthesis of group 5 transition metal dichalcogenide thin films
Source: Royal Society of Chemistry journal article supplement (doi:10.1039/c8tc03909g), 2018-01-01
Supplement: c8tc03909g1.pdf [file c8tc03909g1.pdf]

Supporting Information

# Microwave-Assisted Synthesis of Group 5 Transition Metal Dichalcogenide Thin Films

Junghyeok Kwak,<sup>1</sup> Sunshin Jung,<sup>2</sup> Noho Lee,<sup>1</sup> Kalianan Thiyagarajan,<sup>1</sup> Jong Kyu Kim,<sup>1</sup>  
Anupam Giri,<sup>1\*</sup> Unyong Jeong<sup>1\*</sup>

<sup>1</sup>Department of Materials Science and Engineering, Pohang University of Science and Technology, 77 Cheongam-Ro, Nam-Gu, Pohang 37673, Korea.

<sup>2</sup>Nano Hybrid Technology Research Center, Korea Electrotechnology Research Institute, 12, Bulmosan-ro 10Beon-gil, Changwon 51543, Korea

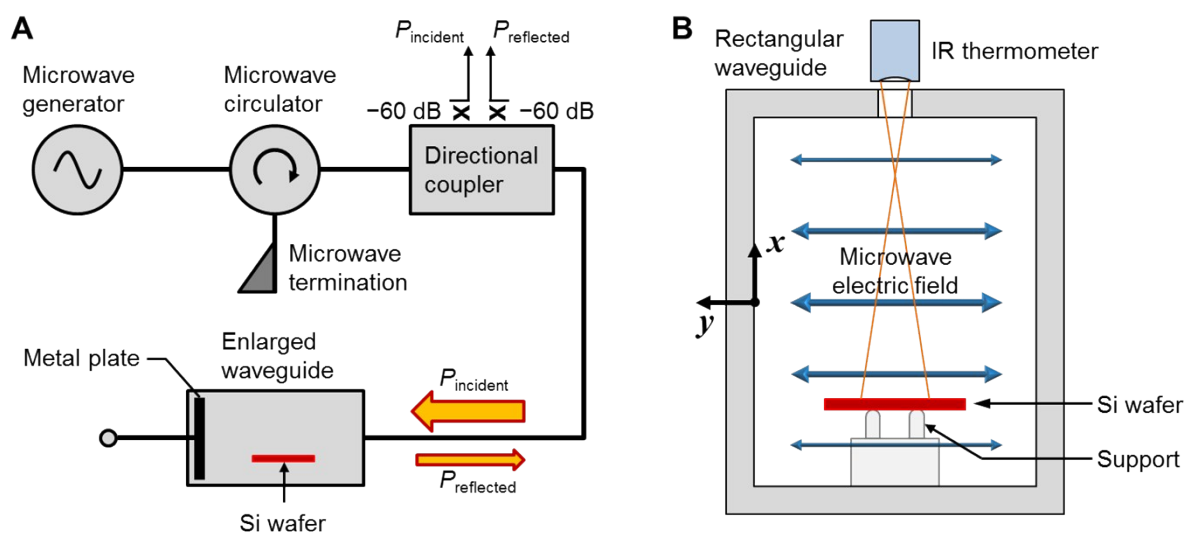

**Figure S1.** Schematic of microwave irradiation setup. (A) Microwaves were irradiated on the Si wafer in an enlarged waveguide. Incident and reflected microwave powers were monitored with a 60-dB directional coupler and two power sensors. (B) The wafer was supported by four small alumina pieces and was placed in parallel to the microwave electric field to increase the microwave-wafer interaction.

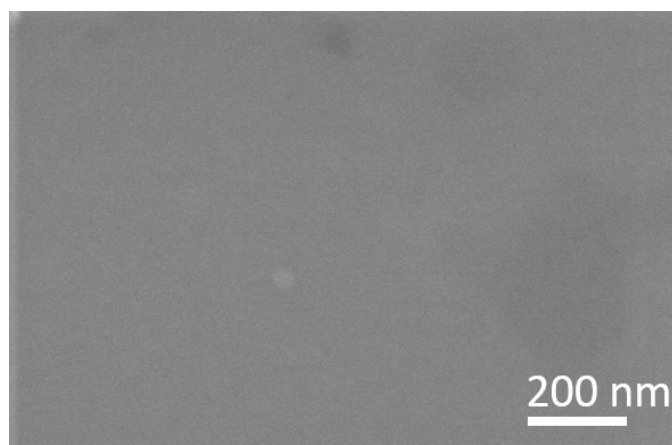

**Figure S2.** SEM image of the Si wafer surface at 40 s microwave irradiation which is before the incubation time (43 s). The surface has no reaction product.

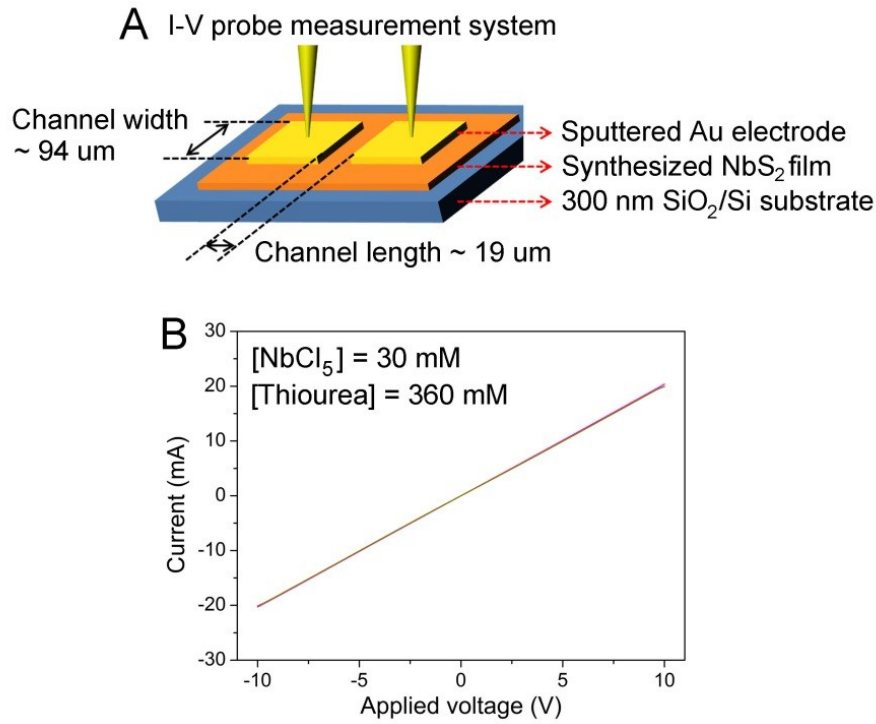

**Figure S3.** Electrical property of the  $\text{NbS}_2$  film. (A) Schematic illustration of sample preparation and measurement. (B) I-V profile obtained from the  $\text{NbS}_2$  film synthesized with precursor concentration of [ $\text{NbCl}_5$ ]: [thiourea] = 30: 360 mM.

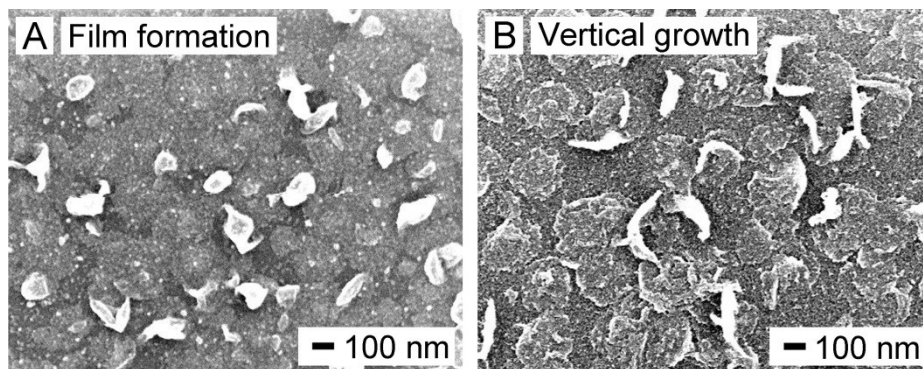

**Figure S4.** Top-view SEM images of  $\text{NbSe}_2$  film in the film formation stage (A) and in the vertical growth stage (B).

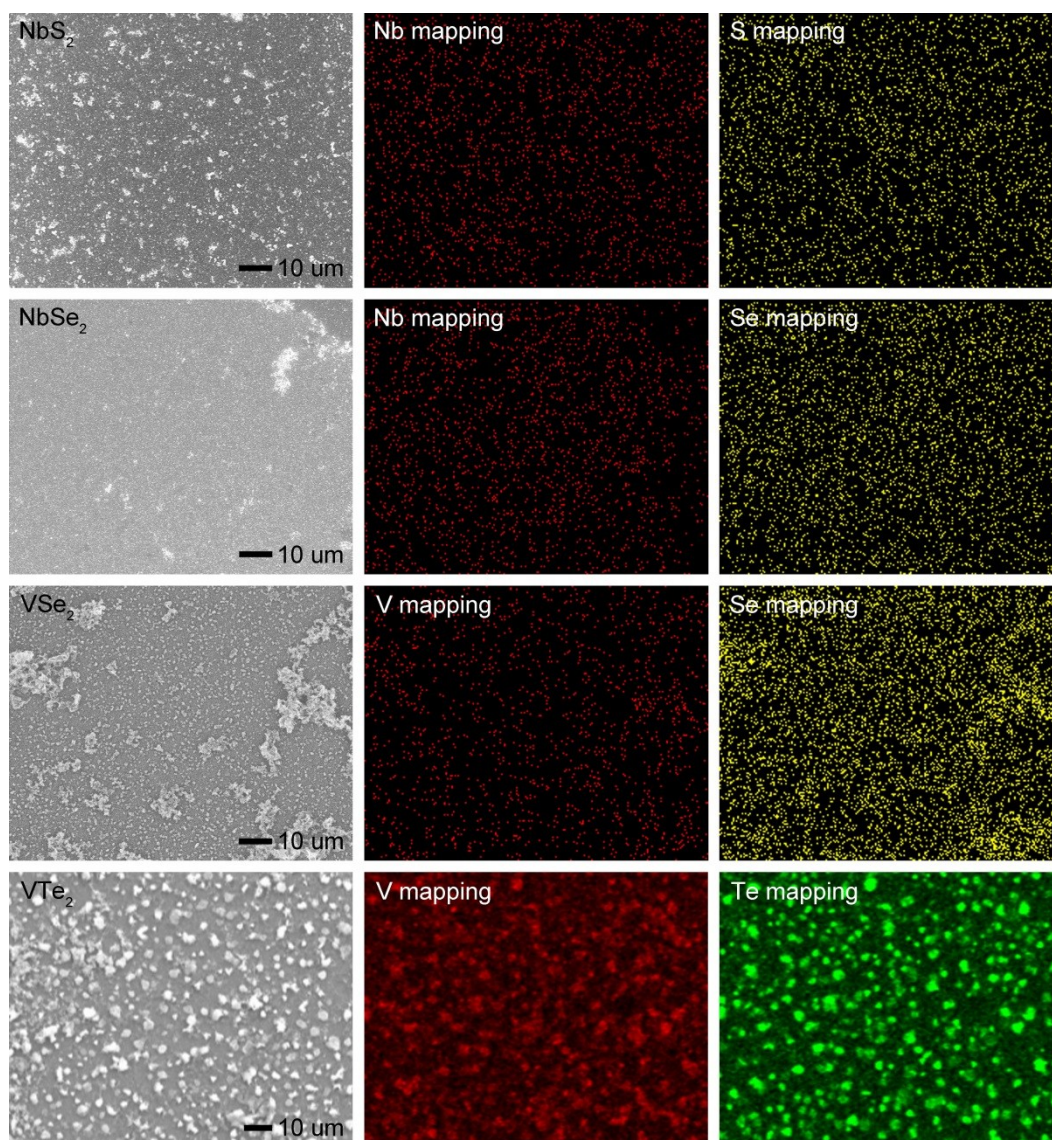

**Figure S5.** SEM images and corresponding EDS-mapping images of the as-synthesized films of NbS<sub>2</sub>, NbSe<sub>2</sub>, VSe<sub>2</sub>, and VTe<sub>2</sub>.

**Table S1.** Elemental composition obtained from EDS mapping of the as-synthesized films of NbS<sub>2</sub>, NbSe<sub>2</sub>, VSe<sub>2</sub>, and VTe<sub>2</sub>.

| <b>Materials</b>  | <b>Elemental compositions</b> |
|-------------------|-------------------------------|
| NbS <sub>2</sub>  | Nb : S = 1 : 1.68             |
| NbSe <sub>2</sub> | Nb : Se = 1 : 0.31            |
| VSe <sub>2</sub>  | V : Se = 1 : 2.41             |
| VTe <sub>2</sub>  | V : Te = 1 : 0.71             |
